# Supplementary material for: Clinical experience of bench surgery combined with autotransplantation after three-dimensional laparoscopic nephrectomy for the treatment of highly complex renal tumor
Source: Springer Nature journal article supplement (doi:10.1186/s12957-023-03246-9), 2023-11-29
Supplement: 12957_2023_3246_MOESM1_ESM.pdf [file 12957_2023_3246_MOESM1_ESM.pdf]

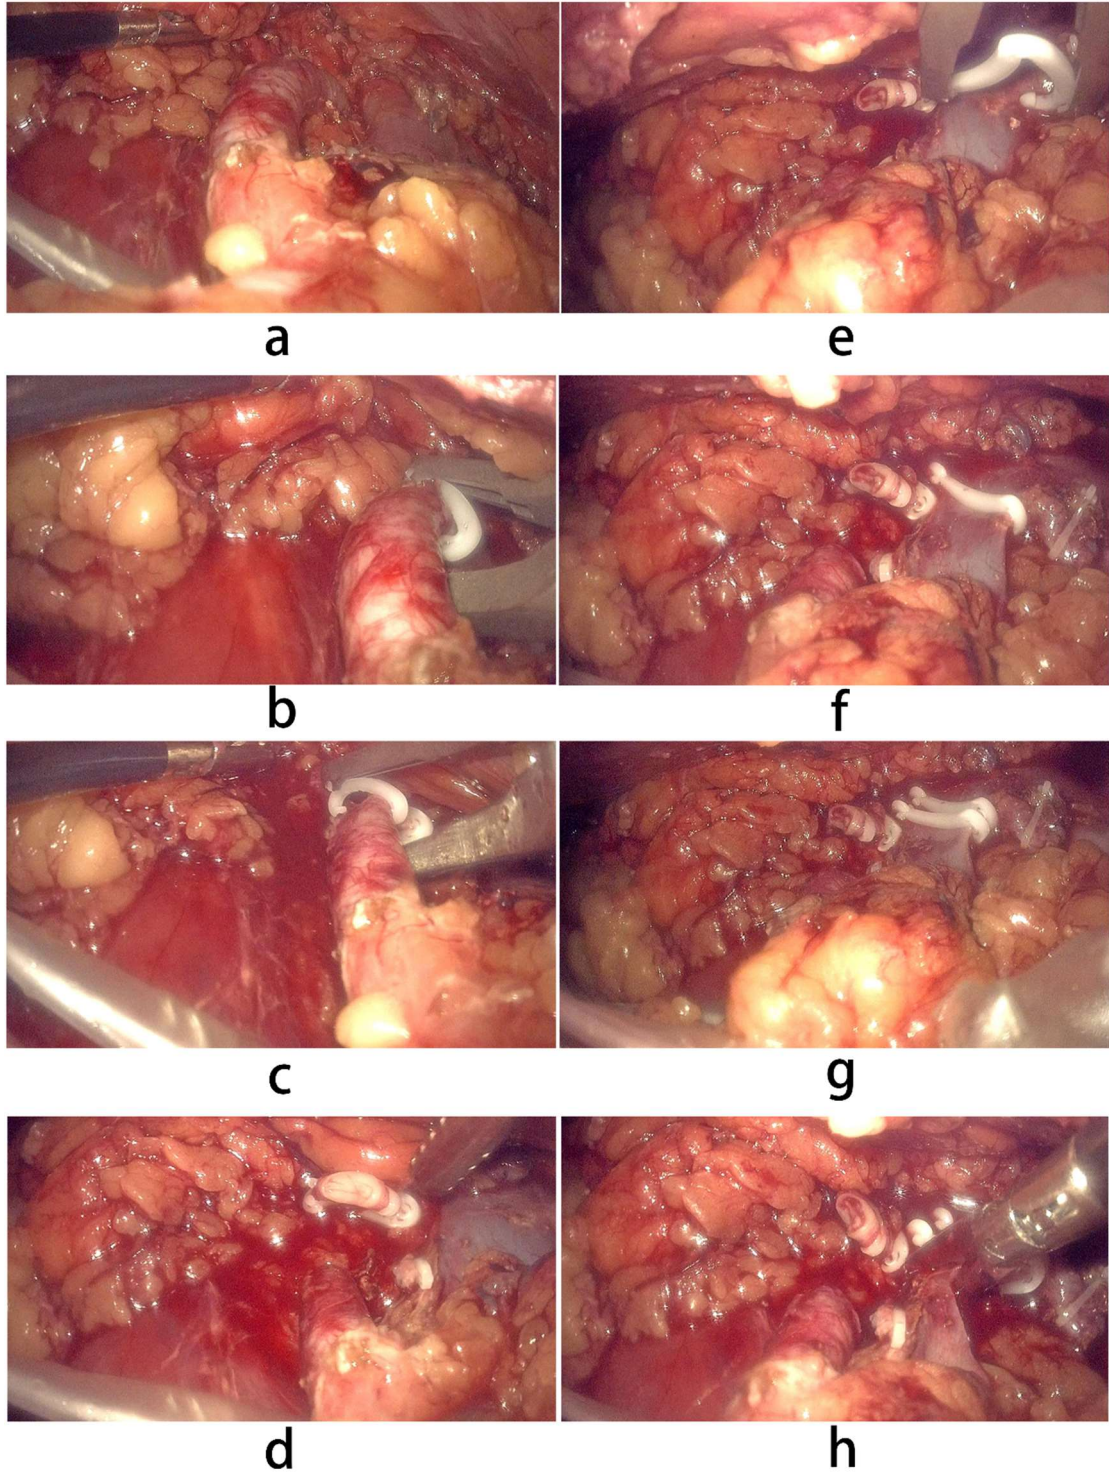

Fig. supplement Three-dimensional laparoscopic nephrectomy. The renal pedicle was fully exposed. The renal artery (a to d) and vein (e to h) were transected after applying Hem-o-loks to the clamp.
